# Supplementary material for: Effect of different cocoon stifling methods on the properties of silk fibroin biomaterials
Source: PubMed Central journal article supplement (PMC6491555; doi:10.1038/s41598-019-43134-5), 2019-04-30
Supplement: 41598_2019_43134_MOESM1_ESM.pdf [file 41598_2019_43134_MOESM1_ESM.pdf]

***Effect of different cocoon stifling methods on the properties of silk fibroin biomaterials.***

Salvador D. Aznar-Cervantes\*, Ana Pagan, Beatriz Monteagudo Santesteban, José L. Cenis.

*Instituto Murciano de Investigación y Desarrollo Agrario y Alimentario (IMIDA), Department of Biotechnology. La Alberca (Murcia), E-30150, Spain.*

\*Corresponding Author: Salvador D. Aznar-Cervantes. Tel: +34 968368568, e-mail: [sdac1@um.es](mailto:sdac1@um.es)

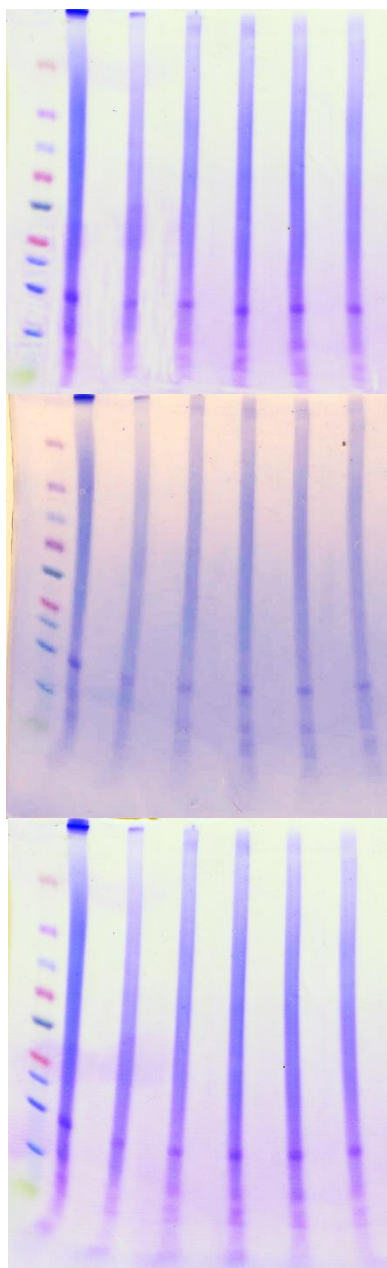

**Figure S1.** Images of full-length gels (SDS-PAGE) obtained for fibroin dissolutions from cocoons stifled by means of different protocols. The lanes observed from left to right correspond to: molecular weight marker, negative control, stifling by means of sun exposure, water vapour exposure and dry heat at 55°C, 70°C and 85°C, respectively.

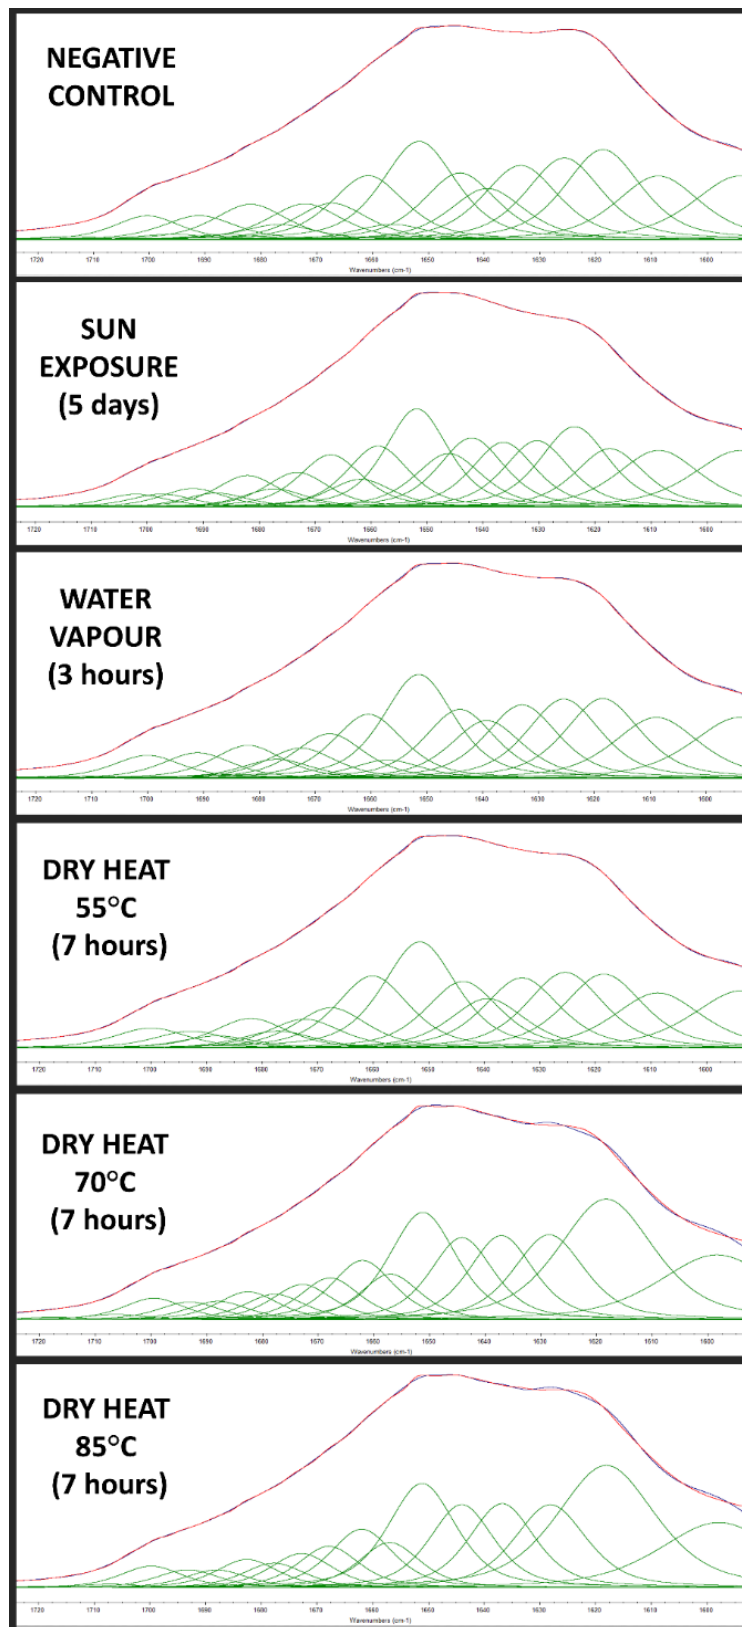

**Figure S2.** Illustrative images of Fourier self-deconvolution (amide I band of fibroin) performed to the annealed films produced with SF dissolutions obtained from cocoons stifled by means of different treatments.

**Table S1.** Mechanical properties of the annealed films made with SF dissolutions obtained from cocoons stifled with different methodologies. Data are expressed as average values  $\pm$  standard deviation (n=3).

\*statistically different values with the negative control (Bonferroni,  $p < 0.01$ )

|                             | <b>Tensile strength<br/>(MPa)</b> | <b>Strain at break<br/>(%)</b> | <b>Elastic modulus<br/>(GPa)</b> |
|-----------------------------|-----------------------------------|--------------------------------|----------------------------------|
| <b>NEGATIVE CONTROL</b>     | 46.39 $\pm$ 4.40                  | 2.70 $\pm$ 0.33                | 2.32 $\pm$ 0.33                  |
| <b>SUN EXPOSURE (5 d)</b>   | 27.70 $\pm$ 6.77*                 | 1.54 $\pm$ 0.24*               | 2.31 $\pm$ 0.44                  |
| <b>WATER VAPOUR (3 h)</b>   | 47.97 $\pm$ 2.55                  | 2.27 $\pm$ 0.21                | 2.35 $\pm$ 0.17                  |
| <b>DRY HEAT 55 °C (7 h)</b> | 40.50 $\pm$ 4.96                  | 2.33 $\pm$ 0.15                | 2.35 $\pm$ 0.23                  |
| <b>DRY HEAT 70 °C (7 h)</b> | 35.30 $\pm$ 3.87                  | 1.90 $\pm$ 0.36                | 2.34 $\pm$ 0.12                  |
| <b>DRY HEAT 85 °C (7 h)</b> | 22.96 $\pm$ 6.28*                 | 1.33 $\pm$ 0.25*               | 2.36 $\pm$ 0.33                  |
